# Supplementary material for: Noncoding RNA gene silencing through genomic integration of RNA destabilizing elements using zinc finger nucleases
Source: HighWire-hosted journal article supplement (doi:10.1101/gr.122358.111), 2011-08-15
Supplement: Gutschner122358_Supplementary_Fig1.pdf [file Gutschner122358_Supplementary_Fig1.pdf]

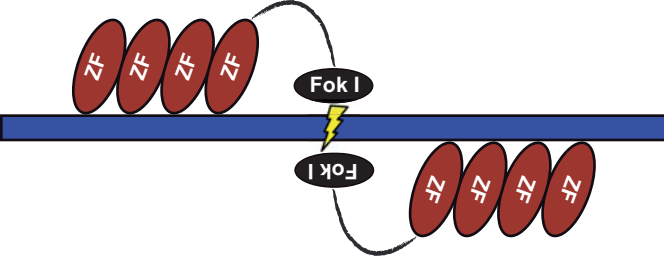

Site-specific DNA double-strand break  
repaired by intracellular mechanisms:

Non-Homologous  
End Joining

Homologous  
Recombination

Frameshift

Integration of  
exogenous DNA sequences  
allows targeting of  
protein-coding  
and non-coding genes

Knockout of  
protein-coding genes
