# Supplementary figures and images for: Noncoding RNA gene silencing through genomic integration of RNA destabilizing elements using zinc finger nucleases
Source: HighWire-hosted journal article supplement (doi:10.1101/gr.122358.111), 2011-08-15

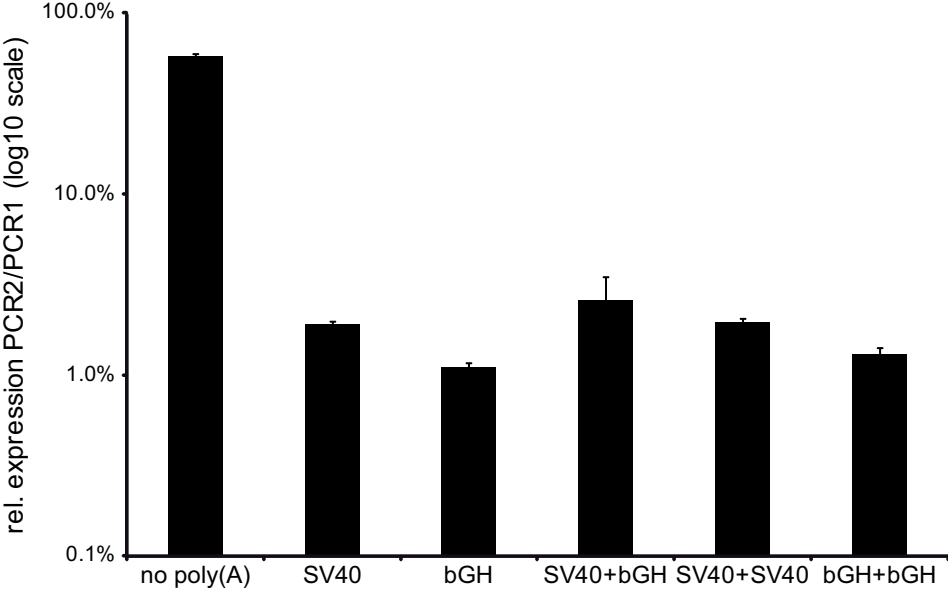

Supplement: Gutschner122358_Supplementary_Fig2.pdf [file Gutschner122358_Supplementary_Fig2.pdf]
